# Supplementary material for: Exploring Ln(III) Ion-Based Luminescent Species as Down-Shifters for Photovoltaic Solar Cells
Source: Preprints.org preprint supplement (doi:10.20944/preprints202306.1067.v1), 2023-06-15
Supplement: Supplementary file 1 [file supplementary]

**Supplementary Materials**

**Exploring Ln(III) Ion-Based Luminescent Species as Down-Shifters for Photovoltaic Solar Cells**

**Gabriela Brito-Santos 1, Cecilio Hernández-Rodríguez 2, *, Beatriz Gil-Hernández 3 , Joaquín Sanchiz 3, 4, Inocencio R. Martín2, 5 , Benjamín González-Díaz 6and Ricardo Guerrero-Lemus2, 7**

1 Departamento de Química, Facultad de Ciencias, Universidad de La Laguna (ULL), Avenida Astrofísico Francisco Sánchez S/N, 38206 La Laguna (Tenerife), Spain; [gbritosa@ull.edu.es](mailto:gbritosa@ull.edu.es)

2, * Departamento de Física, Facultad de Ciencias, Instituto Universitario de Materiales y Nanotecnología, Universidad de La Laguna (ULL), Avenida Astrofísico Francisco Sánchez S/N, 38206 La Laguna (Tenerife), Spain; * correspondence: [chdezr@ull.edu.es](mailto:chdezr@ull.edu.es); Tel.: +34 922318243

3 Departamento de Química, Facultad de Ciencias, Instituto Universitario de Materiales y Nanotecnología, Universidad de La Laguna (ULL), Avenida Astrofísico Francisco Sánchez S/N, 38206 La Laguna (Tenerife), Spain; [beagher@ull.edu.es](mailto:beagher@ull.edu.es)

3, 4 [jsanchiz@ull.edu.es](mailto:jsanchiz@ull.edu.es)

2, 5 imartin[@ull.edu.es](mailto:rglemus@ull.edu.es)

6 Departamento de Ingeniería Industrial, Escuela Superior de Ingeniería y Tecnología, Universidad de La Laguna, Camino San Francisco de Paula S/N, 38206 La Laguna (Tenerife); Spain; bgdiaz[@ull.edu.es](mailto:rglemus@ull.edu.es)

2, 7 [rglemus@ull.edu.es](mailto:rglemus@ull.edu.es)


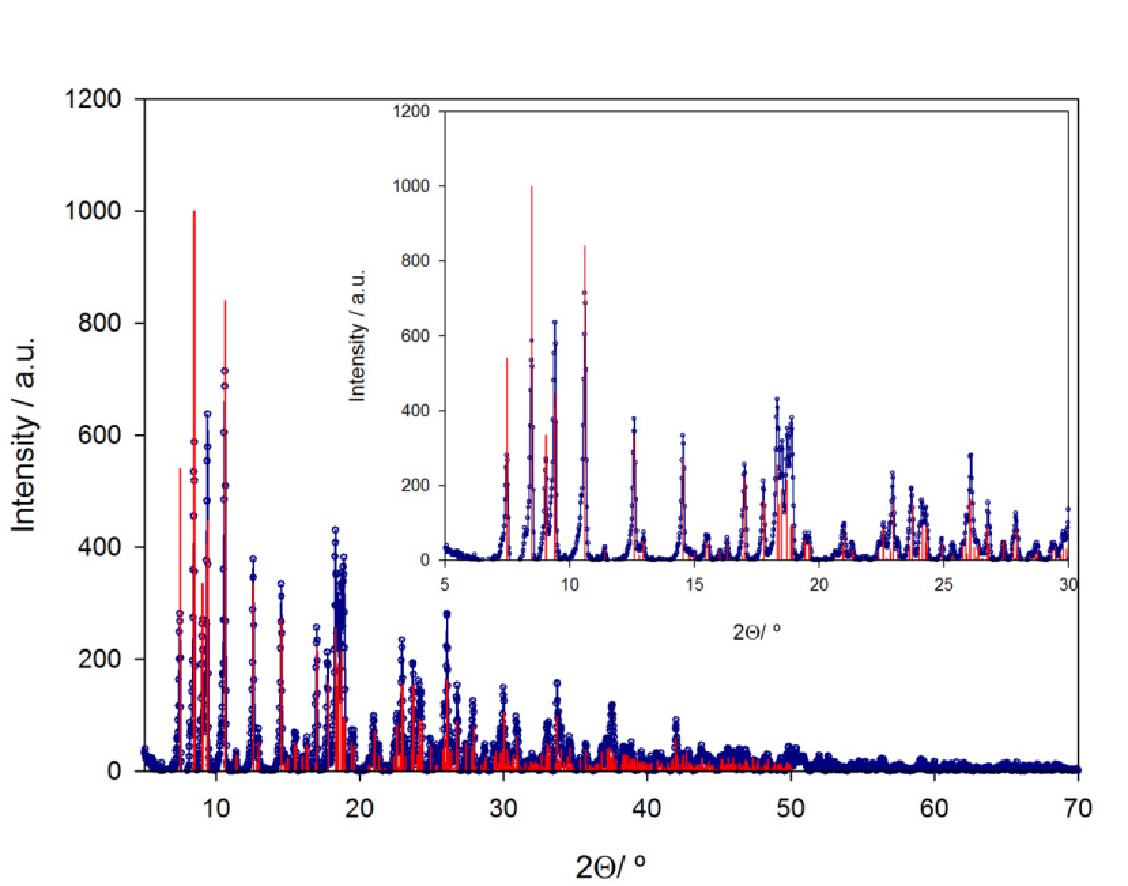


**Figure S1**. Simulated (red bars) and experimental (blue dots) X-Ray powder diffraction patterns for [Eu2(phen)2(bz)6].

Niu, S. Y.; Yang, B.; Cao, J. Q.; Yang, G. D.; Bu, W. M., Synthesis, characterization and structure of tetrabenzoyloxy bridged binuclear Eu( III ) complex. Kao Teng Hsueh Hsiao Hua Heush Hsueh Pao/ *Chemical Journal of Chinese Universities* **1997**; *18*, 1917-1920.


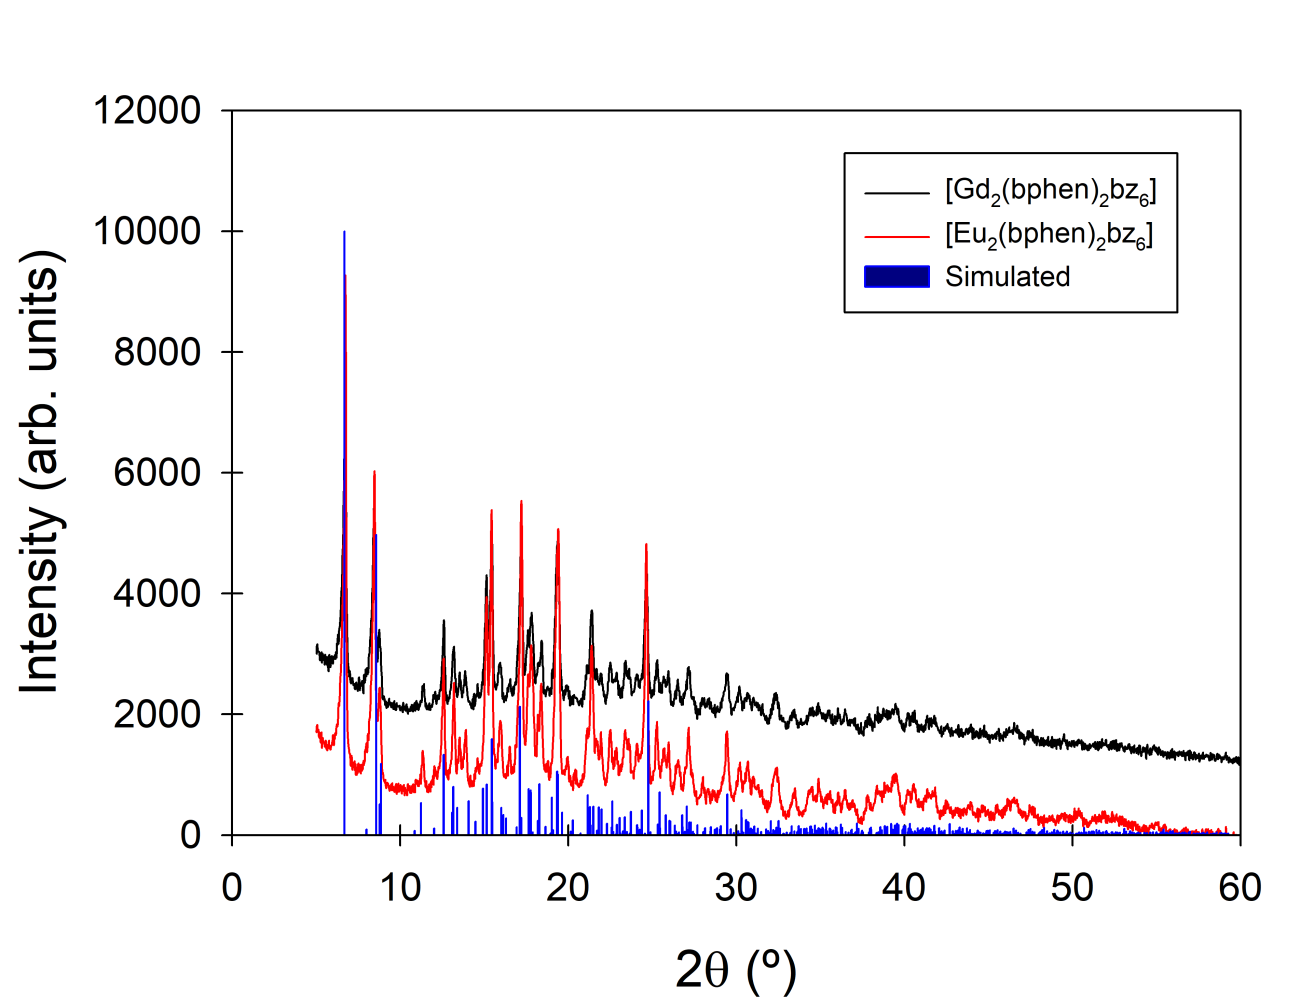


**Figure S2**. ExperimentalX-Ray powder diffraction patterns for compounds[Eu2(bphen)2(bz)6] (red) and [Gd2(bphen)2(bz)6] (black). There is an almost perfect overlap between both patterns which means both compounds display the same structure. The simulated spectrum from the single-crystal structure of [Eu2(bphen)2(bz)6] is also showed (blue).


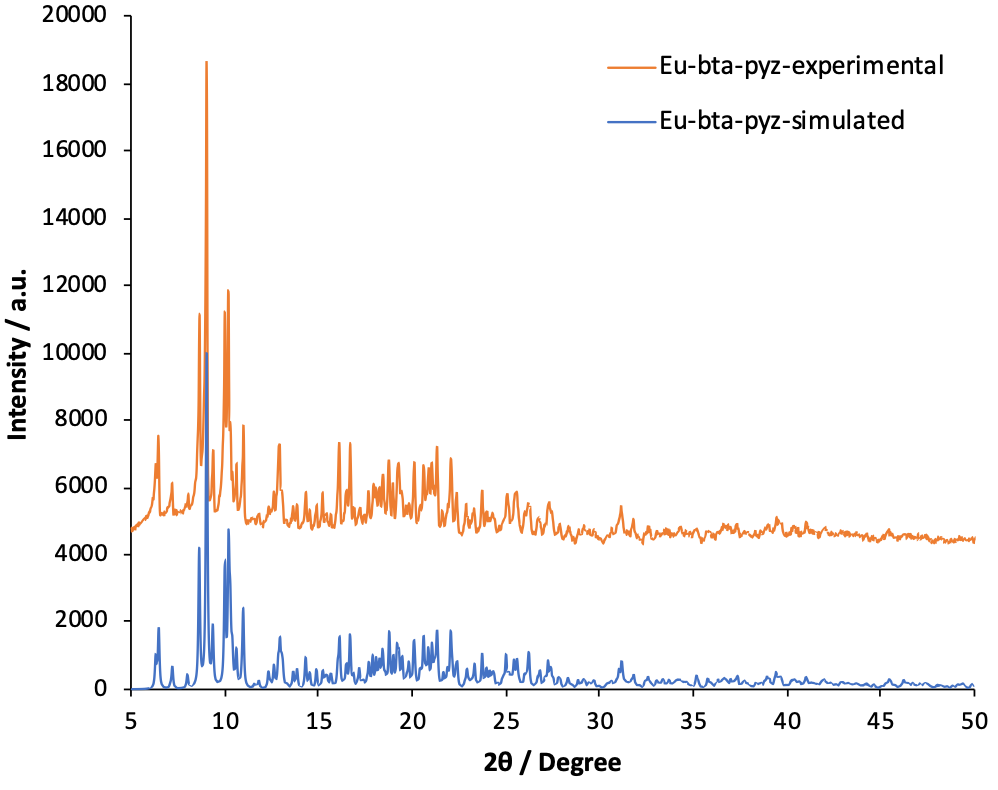


**Figure S3**.Simulated and experimental PXRD patterns (blue and orange lines, respectively for [Eu(bta)3pyz-phen] complex.


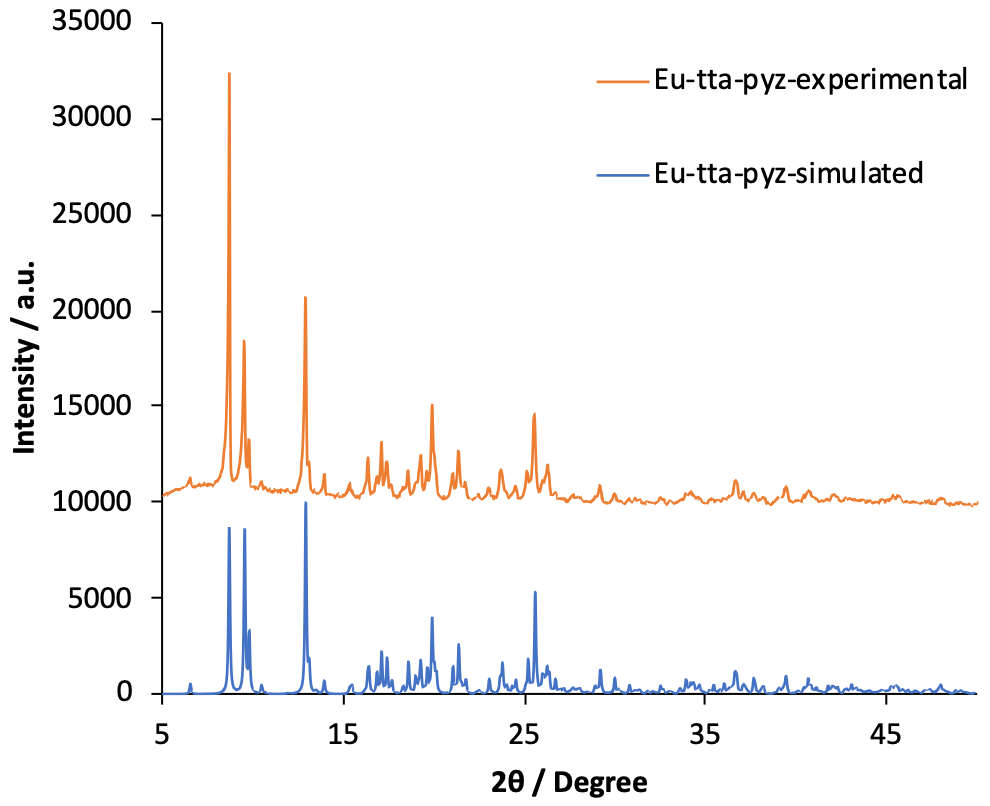


**Figure S4**.Simulated and experimental PXRD patterns (blue and orange lines, respectively for [Eu(tta)3pyz-phen] complex.


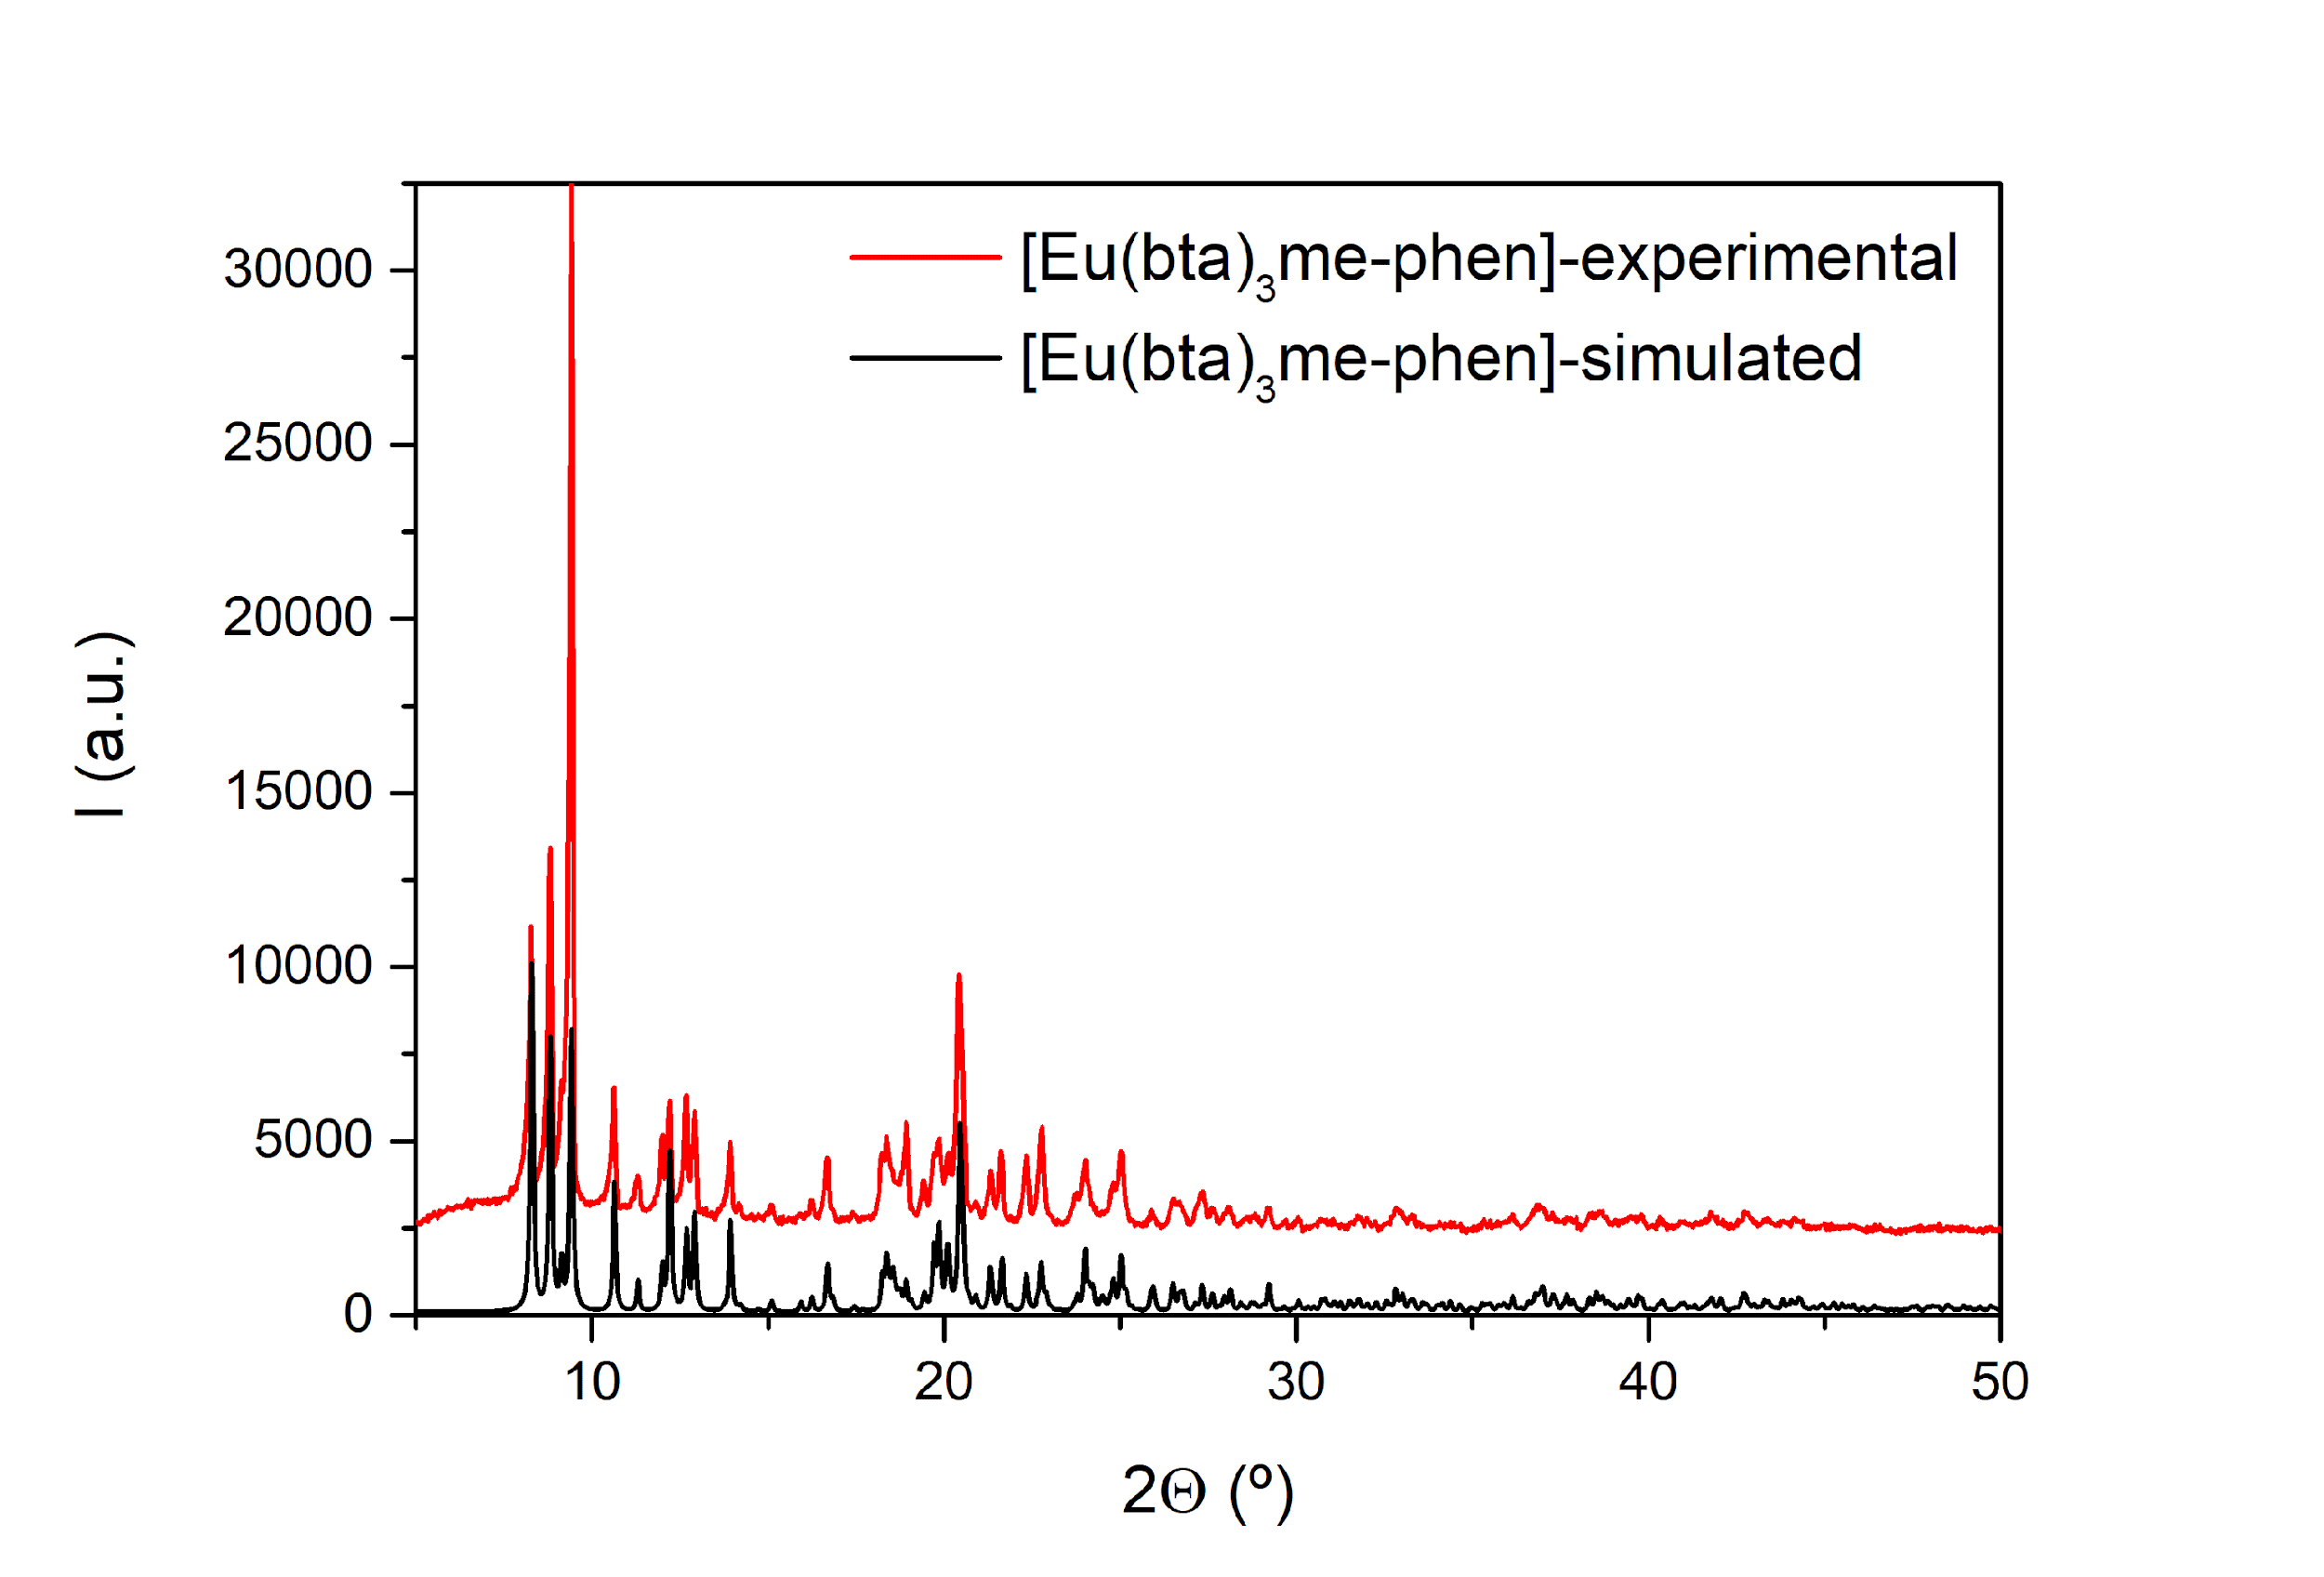


**Figure S5**.Simulated and experimental PXRD patterns (black and red lines, respectively for [Eu(bta)3me-phen] complex.


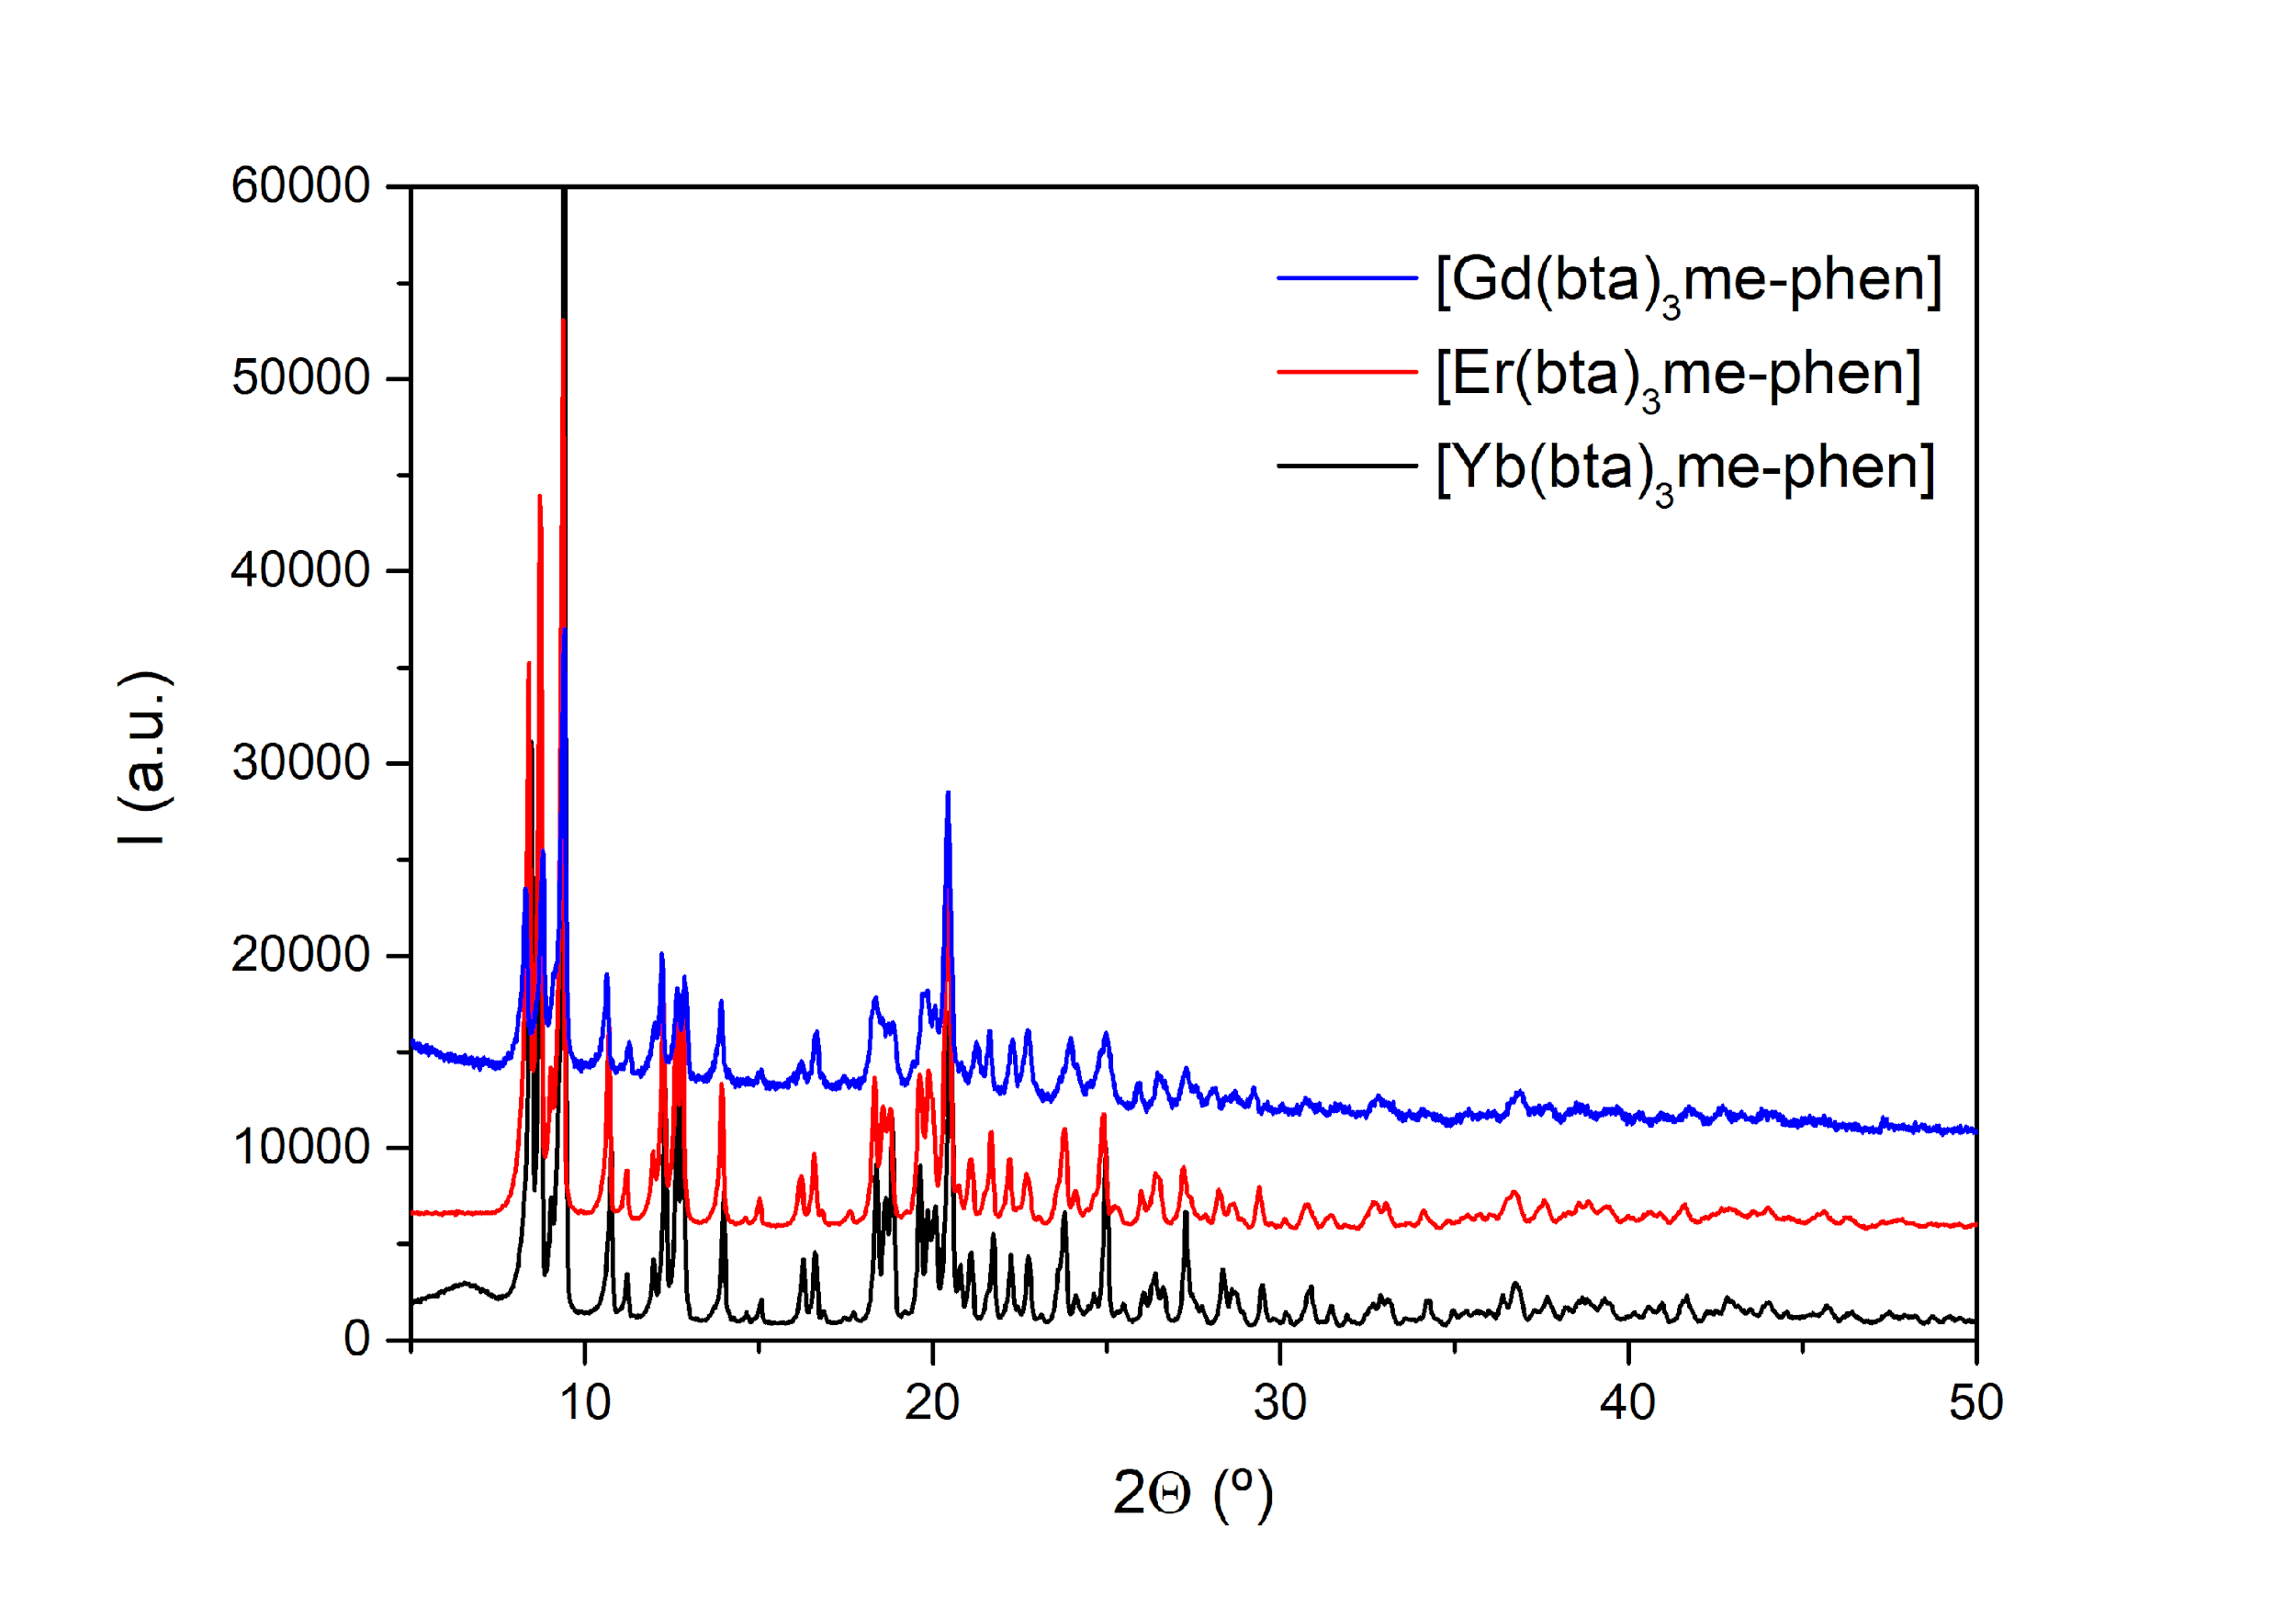


**Figure S6**. Experimental PXRD patterns of [Yb(bta)3me-phen], [Er(bta)3me-phen] and [Gd(bta)3me-phen].


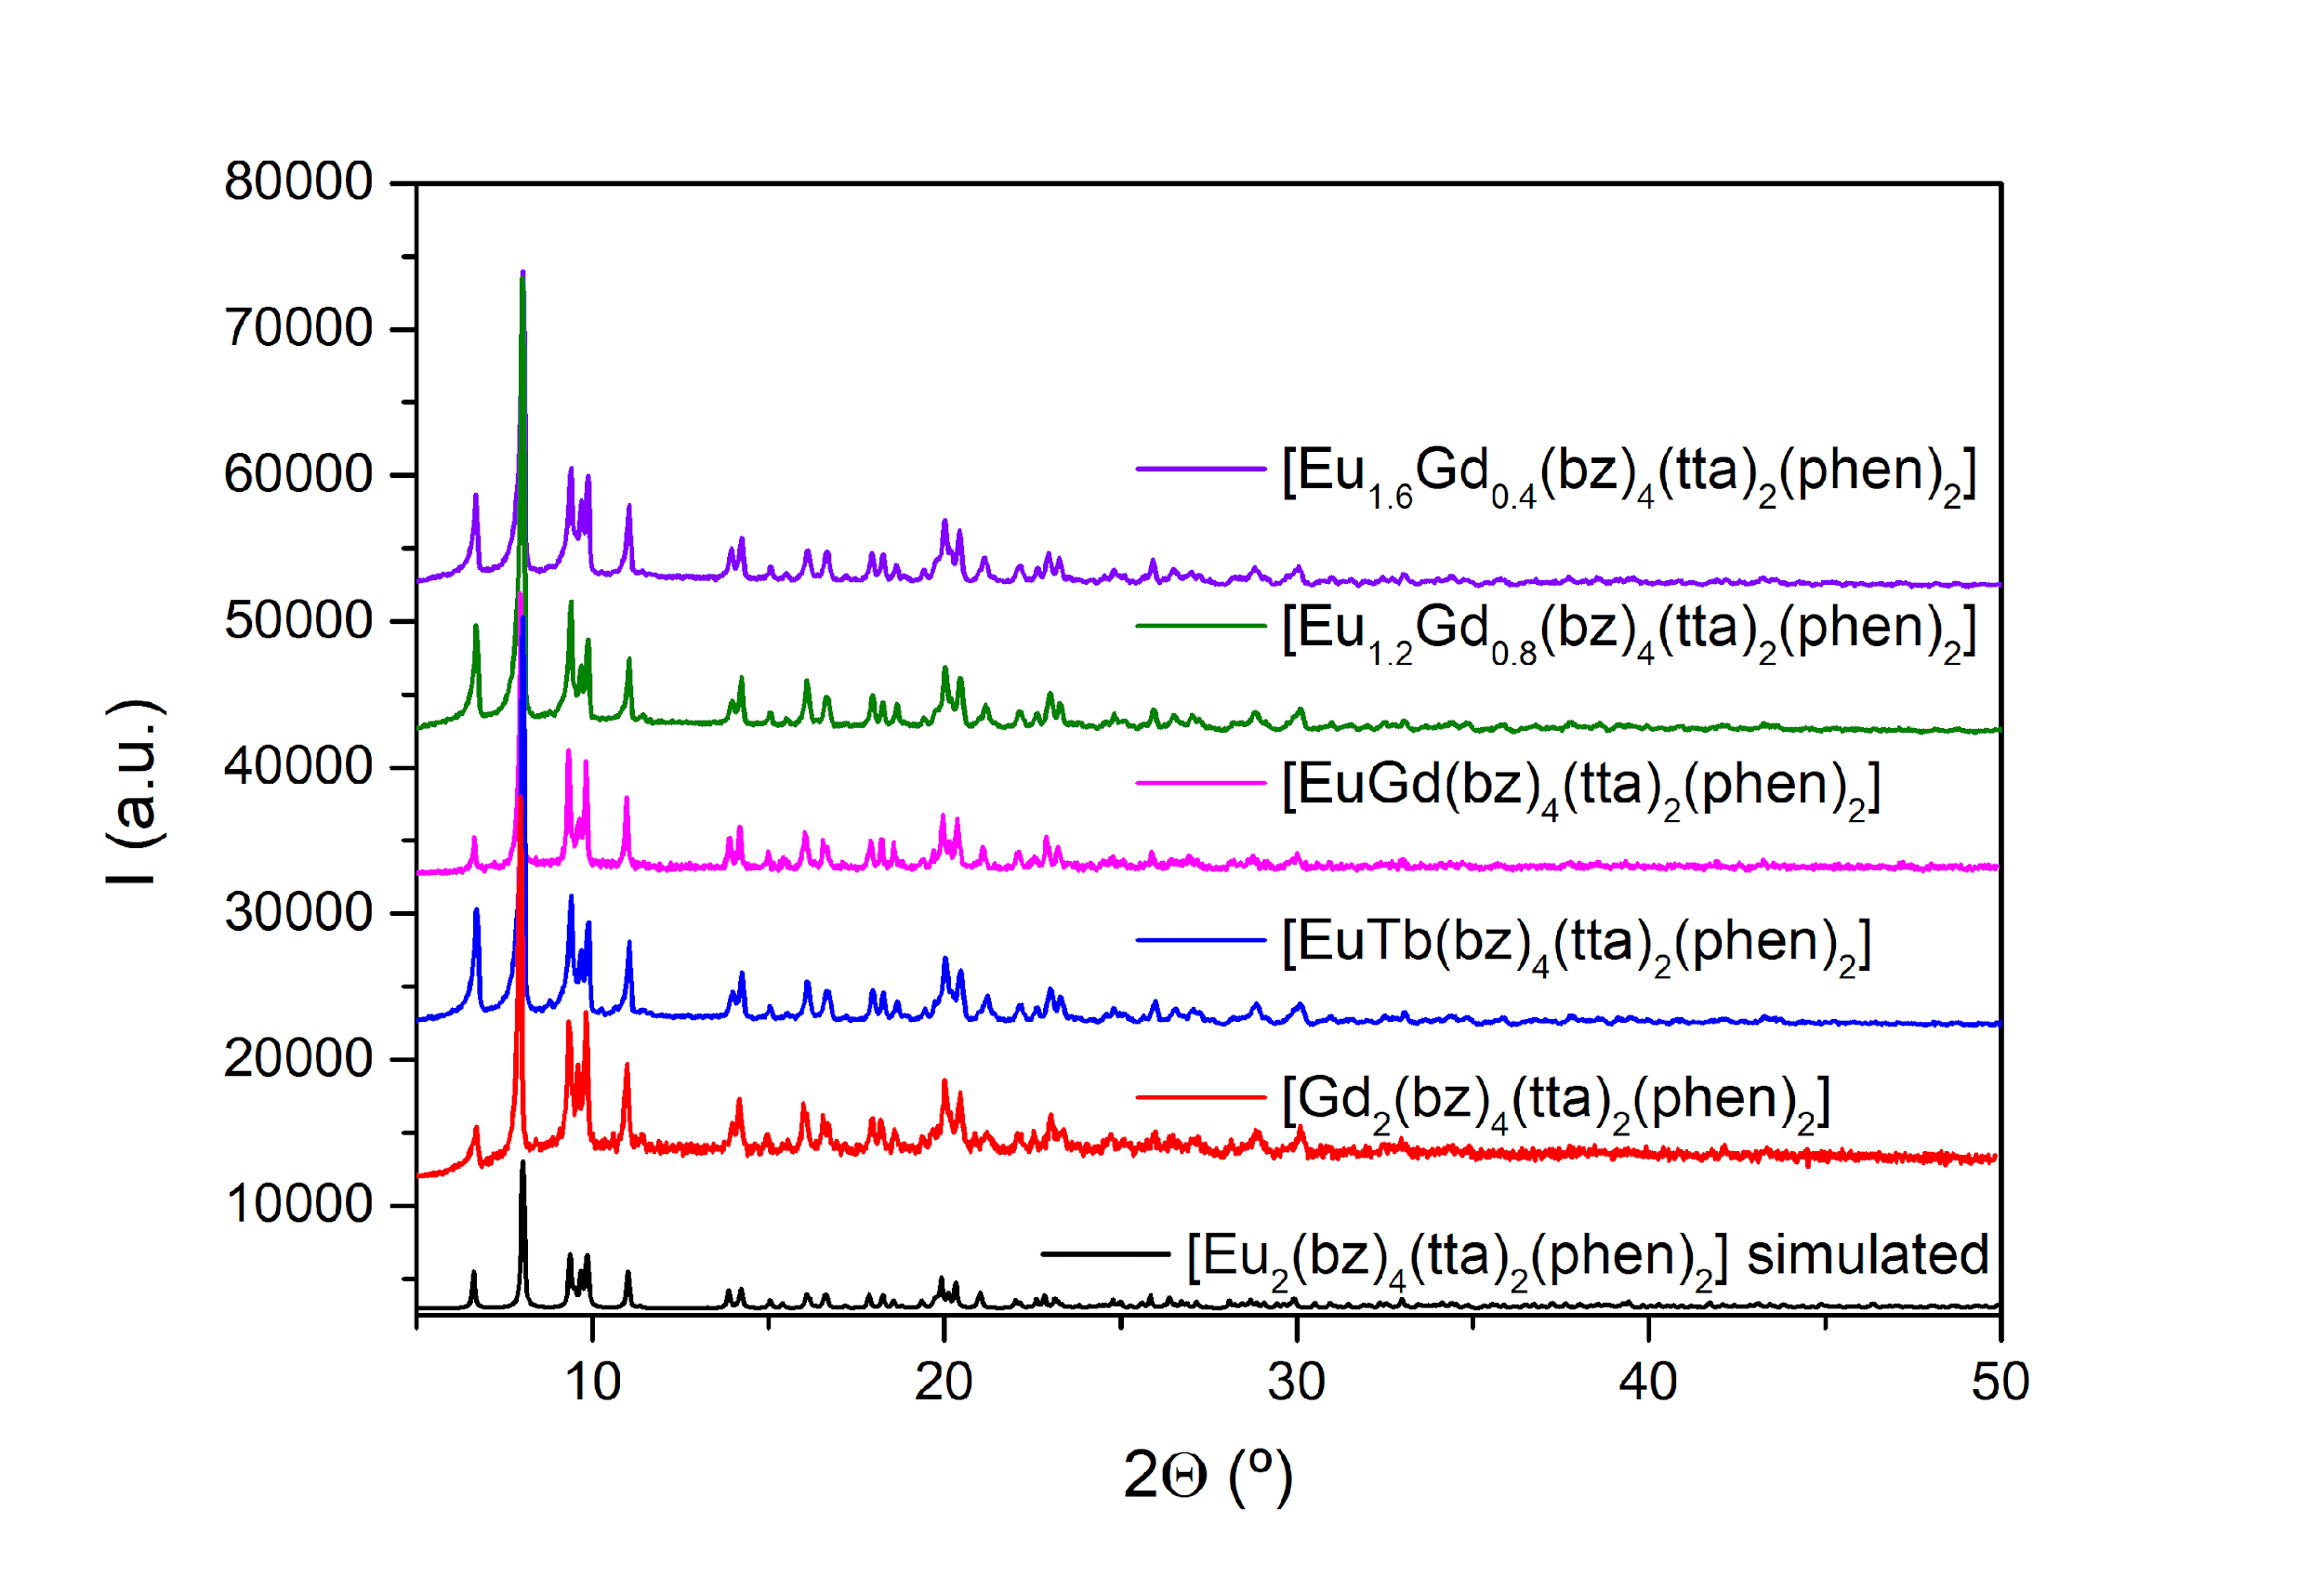


**Figure S7**. Experimental PXRD patterns of [M1M2(bz)4(tta)2(phen)2].
