# Supplementary material for: Exploring Ln(III) Ion-Based Luminescent Species as Down-Shifters for Photovoltaic Solar Cells
Source: Preprints.org preprint supplement (doi:10.20944/preprints202306.1067.v1), 2023-06-15
Supplement: Supplementary file 3 [file Supplemantary Materials S8-12_Cecilio Hernndez-Rodrguez.docx]

**Supplementary Materials**

**Exploring Ln(III) Ion-Based Luminescent Species as Down-Shifters for Photovoltaic Solar Cells**

**Gabriela Brito-Santos 1, Cecilio Hernández-Rodríguez 2, *, Beatriz Gil-Hernández 3 , Joaquín Sanchiz 3, 4, Inocencio R. Martín2, 5 , Benjamín González-Díaz 6and Ricardo Guerrero-Lemus2, 7**

1 Departamento de Química, Facultad de Ciencias, Universidad de La Laguna (ULL), Avenida Astrofísico Francisco Sánchez S/N, 38206 La Laguna (Tenerife), Spain; [gbritosa@ull.edu.es](mailto:gbritosa@ull.edu.es)

2, *Departamento de Física, Facultad de Ciencias, Instituto Universitario de Materiales y Nanotecnología, Universidad de La Laguna (ULL), Avenida Astrofísico Francisco Sánchez S/N, 38206 La Laguna (Tenerife), Spain; * correspondence: [chdezr@ull.edu.es](mailto:chdezr@ull.edu.es); Tel.: +34 922318243

3 Departamento de Química, Facultad de Ciencias, Instituto Universitario de Materiales y Nanotecnología, Universidad de La Laguna (ULL), Avenida Astrofísico Francisco Sánchez S/N, 38206 La Laguna (Tenerife), Spain; [beagher@ull.edu.es](mailto:beagher@ull.edu.es)

3, 4 [jsanchiz@ull.edu.es](mailto:jsanchiz@ull.edu.es)

2, 5 imartin[@ull.edu.es](mailto:rglemus@ull.edu.es)

6 Departamento de Ingeniería Industrial, Escuela Superior de Ingeniería y Tecnología, Universidad de La Laguna, Camino San Francisco de Paula S/N, 38206 La Laguna (Tenerife); Spain; bgdiaz[@ull.edu.es](mailto:rglemus@ull.edu.es)

2, 7[rglemus@ull.edu.es](mailto:rglemus@ull.edu.es)


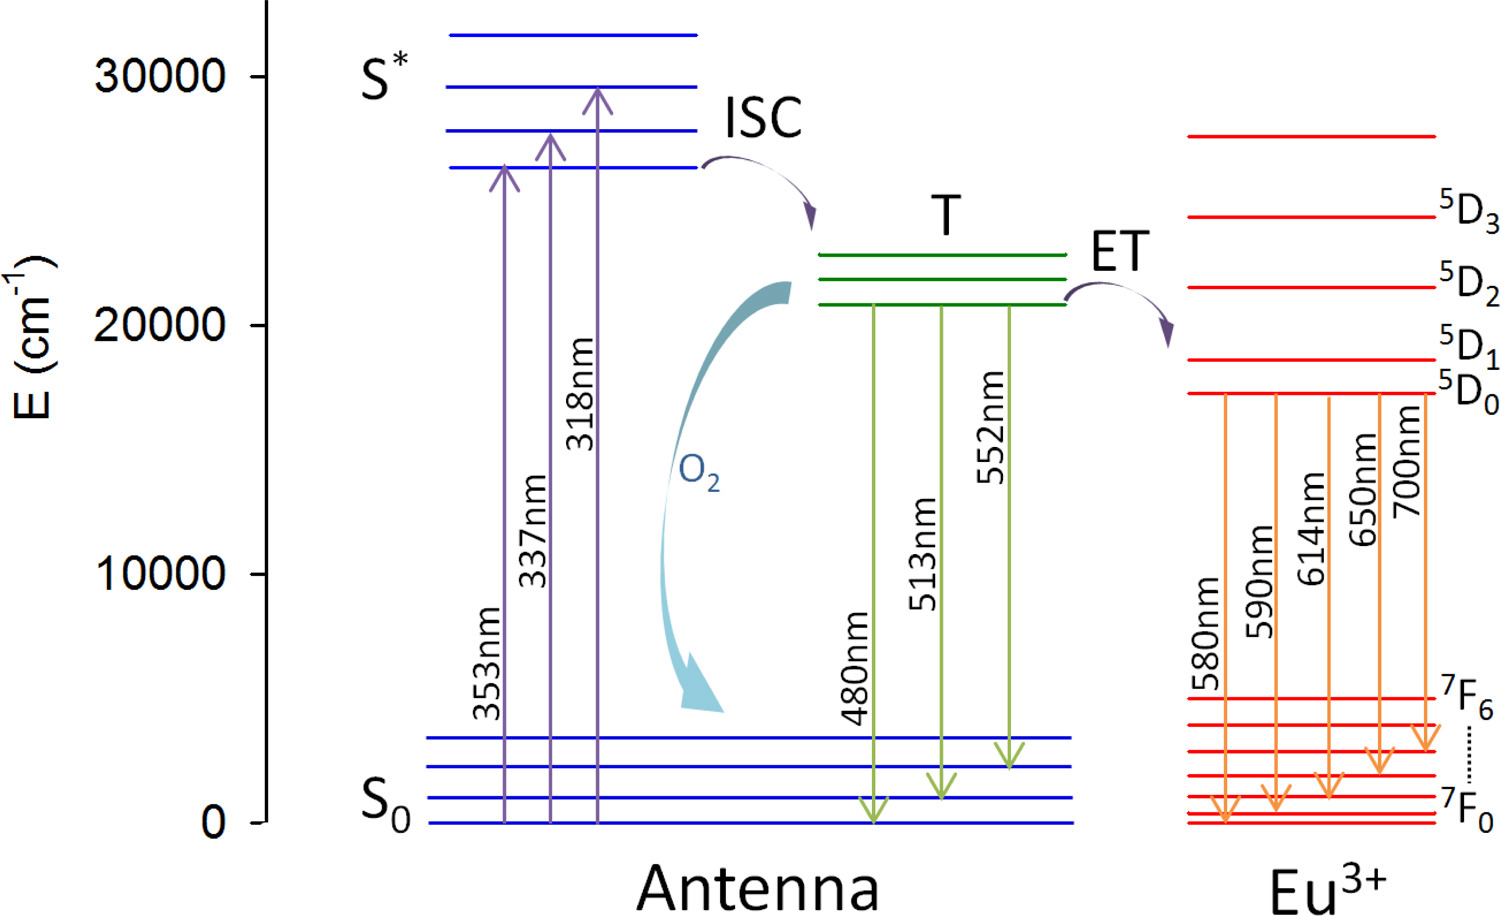


**Figure S8**. Photophysical processes in [Eu2(bphen)2(bz)6] under UV excitation taking to Eu3+ red emission (antenna effect).

The diagram of Figure S8 shows the excitation of the antenna form the ground state So to the excited S* (or S1) single state, followed by intersystem crossing (ISC) to the triplet state T, (or T1). Subsequent quenching of the triplet states by molecular oxygen produces singlet oxygen (O2). Finally, energy transference (ET) from the T state of the ligand to the excited state of the Eu3+ ion is produced.


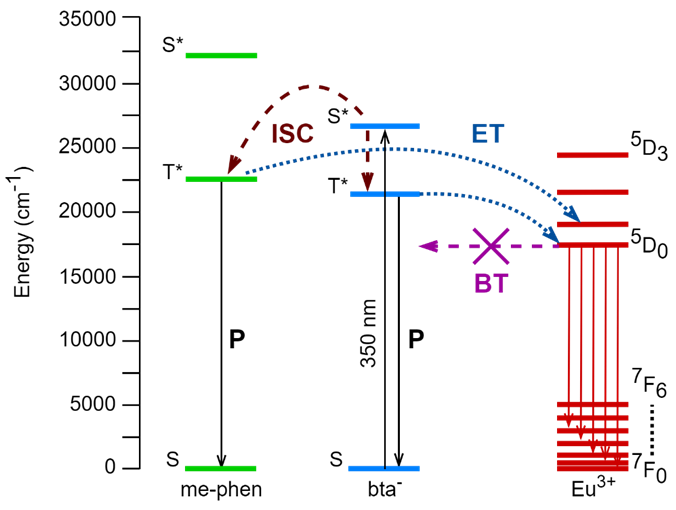


**Figure S9**. Figure 3.17. Scheme of the energy transfer mechanism and photoluminescence process for [Eu(bta)3me-phen].

Energies of the states and the transitions that take place in the luminescent down-shifting process of [Eu(bta)3me-phen] are shown in Figure S9.


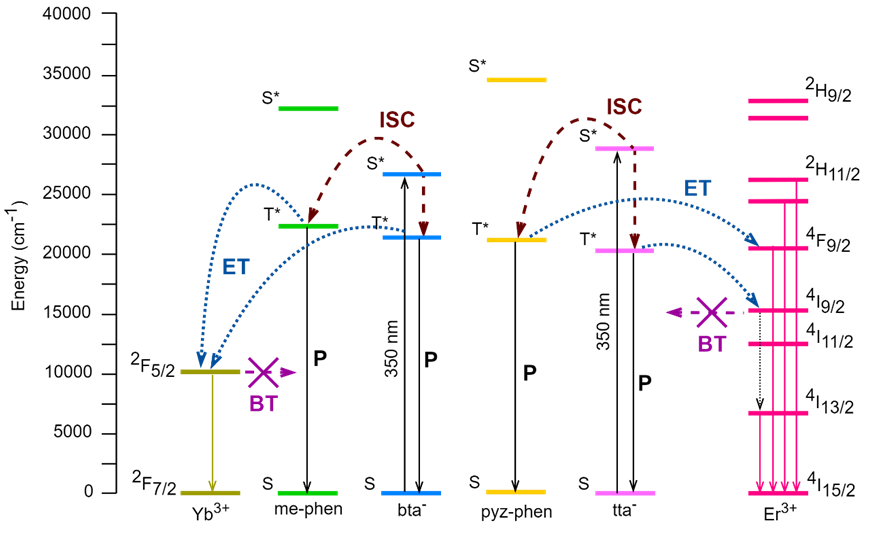


**Figure S10**. Scheme of the energy transfer mechanism and photoluminescence process for Yb(III) and Er(III) complexes.

Figure S10 shows the energy diagram for Yb(III) and Er(III) complexes with the β-diketonates bta- and tta- and the 1,10-phenanthroline derivates me-phen and pyz-phen.


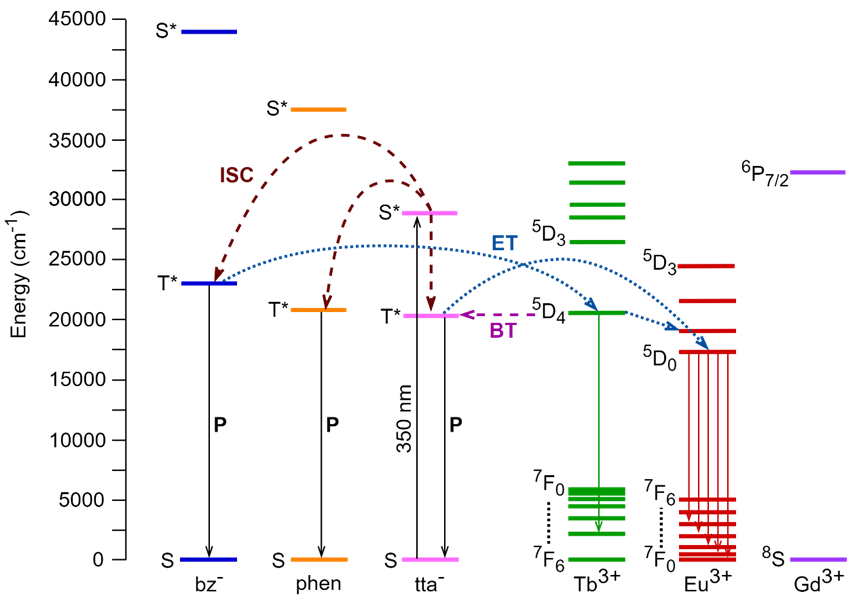


**Figure S11**. Scheme of the energy transfer mechanism and photoluminescence process for [M1M2(bz)4(tta)2(phen)2] series.

The energy diagram for [M1M2(bz)4(tta)2(phen)2] series is shown in figure S11.
